# Supplementary material for: A Systematic Review of Research on Non-Maternal Caregivers’ Feeding of Children 0–3 Years
Source: Int J Environ Res Public Health. 2022 Nov 4;19(21):14463. doi: 10.3390/ijerph192114463 (PMC9658782; doi:10.3390/ijerph192114463)
Supplement: Supplementary file 1 [file ijerph-19-14463-s001.zip]

Archive with 4 entries (4 files):
- Systematic review Supplementary Table S1.pdf
- Systematic review Supplementary Table S2.pdf
- Systematic review Supplementary Table S3.pdf
- Systematic review Supplementary Table S4.pdf
