# Supplementary material for: A Systematic Review of Research on Non-Maternal Caregivers’ Feeding of Children 0–3 Years
Source: Int J Environ Res Public Health. 2022 Nov 4;19(21):14463. doi: 10.3390/ijerph192114463 (PMC9658782; doi:10.3390/ijerph192114463)
Supplement: Supplementary file 1 [file ijerph-19-14463-s001.zip › Systematic review Supplementary Table S1.pdf]

Table S1. Index of information in the review meeting PRISMA Guidelines

| Section                      | # | Checklist item                                                                                                                                                                                                                                                                                     | Reported on page #     |
|------------------------------|---|----------------------------------------------------------------------------------------------------------------------------------------------------------------------------------------------------------------------------------------------------------------------------------------------------|------------------------|
| Title                        | 1 | Identify the study as a systematic review, meta-analysis, or both.                                                                                                                                                                                                                                 | 1                      |
| Abstract: structured summary | 2 | Provide a structured summary including, as applicable: background; objectives; data sources; study eligibility, participants, and interventions; study appraisal and synthesis methods; results; limitations; conclusions and implications of key findings; systematic review registration number. | 2                      |
| Introduction: rationale      | 3 | Describe the rationale for the review in the context of what is already known.                                                                                                                                                                                                                     | 3                      |
| Introduction: objectives     | 4 | Provide an explicit statement of questions being addressed with reference to participants, interventions, comparisons, outcomes, and study design.                                                                                                                                                 | 3                      |
| Methods                      |   |                                                                                                                                                                                                                                                                                                    |                        |
| Protocol and registration    | 5 | Indicate if a review protocol exists and where it can be assessed.                                                                                                                                                                                                                                 | NA                     |
| Eligibility criteria         | 6 | Specific study characteristics used as criteria for eligibility.                                                                                                                                                                                                                                   | 3-4                    |
| Information sources          | 7 | Describe information sources in the search and the date last searched.                                                                                                                                                                                                                             | 3                      |
| Search                       | 8 | Present full electronic search strategy, such that it could be repeated.                                                                                                                                                                                                                           | 3-4, Additional File 2 |

|                                    |    |                                                                                                                                                                |          |
|------------------------------------|----|----------------------------------------------------------------------------------------------------------------------------------------------------------------|----------|
| Study selection                    | 9  | State the process for selecting studies.                                                                                                                       | 4        |
| Data collection process            | 10 | Describe method of data extraction from reports and any processes for obtaining and confirming data from investigators.                                        | 4-5      |
| Data items                         | 11 | List and define all variables for which data were sought and any assumptions and simplifications made.                                                         | 4-5      |
| Risk of bias in individual studies | 12 | Describe methods used for assessing risk of bias of individual studies and how this information will be used in any data synthesis.                            | 4-5      |
| Summary measures                   | 13 | State the summary measures.                                                                                                                                    | 4-5      |
| Synthesis of measures              | 14 | Describe the methods of handling data and combining results of studies, if done, including measures of consistency for each meta-analysis.                     | 4-5      |
| Risk of bias across studies        | 15 | Specify any assessment of risk of bias that may affect the cumulative evidence.                                                                                | 4-5      |
| Additional analyses                | 16 | Describe methods of additional analyses, if done.                                                                                                              | NA       |
| Results                            |    |                                                                                                                                                                |          |
| Study selection                    | 17 | Give numbers of studies screened, assessed for eligibility, and included in the review, with reason for exclusions at each stage, ideally with a flow diagram. | Figure 1 |

|                               |    |                                                                                                                                                                                |                                |
|-------------------------------|----|--------------------------------------------------------------------------------------------------------------------------------------------------------------------------------|--------------------------------|
| Study characteristics         | 18 | For each study, present characteristics for which data were extracted and provide the citations.                                                                               | 28-30 (Table 1)                |
| Risk of bias within studies   | 19 | Present data on risk of bias of each study and if available, any outcome level assessment (see item 12).                                                                       | Additional Files 3-4           |
| Results of individual studies | 20 | For all outcomes considered, present for each study simple summary data for each intervention group and effect estimates and confidence intervals, ideally with a forest plot. | 5-14, 28-30, Additional File 5 |
| Synthesis of results          | 21 | Present results of each meta-analysis done.                                                                                                                                    | NA                             |
| Risk of bias across studies   | 22 | Present results of any assessment of risk of bias across studies (see item 15).                                                                                                | 4-5, 14-15                     |
| Additional analysis           | 23 | Give results of additional analyses, if done.                                                                                                                                  | NA                             |
| Discussion                    |    |                                                                                                                                                                                |                                |
| Summary of evidence           | 24 | Summarize the main findings including the strength of evidence for each main outcome.                                                                                          | 15-18                          |
| Limitations                   | 25 | Discuss limitations at study and outcome level and at review level.                                                                                                            | 18-21                          |
| Conclusions                   | 26 | Provide a general interpretation of the results in the context of other evidence, and implications for future research.                                                        | 18-21                          |

|         |    |  |    |
|---------|----|--|----|
| Funding | 27 |  | 22 |
|---------|----|--|----|
