# Supplementary material for: A Systematic Review of Research on Non-Maternal Caregivers’ Feeding of Children 0–3 Years
Source: Int J Environ Res Public Health. 2022 Nov 4;19(21):14463. doi: 10.3390/ijerph192114463 (PMC9658782; doi:10.3390/ijerph192114463)
Supplement: Supplementary file 1 [file ijerph-19-14463-s001.zip › Systematic review Supplementary Table S3.pdf]

Table S3: Evaluation of design and methods for quantitative studies in the review

| Study                                       | Designed with research Q in mind | Measures allowed research Q to be answered clearly | Population clearly described | Study carried out well | Sample representative | Response rate reported | Population denominator reported | Measures valid and reliable | Appropriate measures for Qs | Same method for different groups | Method introduced bias | Study large enough | Adequate description of data | Appropriate statistical tests | Overall assessment |
|---------------------------------------------|----------------------------------|----------------------------------------------------|------------------------------|------------------------|-----------------------|------------------------|---------------------------------|-----------------------------|-----------------------------|----------------------------------|------------------------|--------------------|------------------------------|-------------------------------|--------------------|
| Ansuya et al. (2018)                        | To an extent                     | Yes                                                | Yes                          | Yes                    | Yes                   | Yes                    | Yes                             | Yes                         | Yes                         | Yes                              | No                     | Yes                | Yes                          | Yes                           | Good               |
| Barrett, Wasser, Thompson, & Bentley (2018) | Yes                              | Yes                                                | Yes                          | Yes                    | Yes                   | Yes                    | No                              | To an extent                | Yes                         | Yes                              | No                     | To an extent       | Yes                          | Yes                           | Fair               |
| Benjamin-Neelon, & Neelon (2020)            | Yes                              | Yes                                                | Yes                          | Yes                    | Yes                   | Yes                    | No                              | To an extent                | Yes                         | No                               | No                     | To an extent       | Yes                          | Yes                           | Fair               |
| Blaine et al. (2015)                        | Yes                              | Yes                                                | Yes                          | Yes                    | Yes                   | No                     | No                              | To an extent                | Yes                         | To an extent                     | No                     | To an extent       | Yes                          | Yes                           | Fair               |
| Blissett, Meyer, & Haycraft (2006)          | Yes                              | Yes                                                | Yes                          | Yes                    | Yes                   | No                     | No                              | Yes                         | Yes                         | Yes                              | No                     | To an extent       | Yes                          | Yes                           | Fair               |
| Chakona (2020)                              | Yes                              | Yes                                                | Yes                          | Yes                    | Yes                   | No                     | No                              | Yes                         | Yes                         | Yes                              | No                     | To an extent       | Yes                          | Yes                           | Fair               |
| Chung et al. (2020)                         | No                               | Yes                                                | Yes                          | Yes                    | Yes                   | Yes                    | Yes                             | Yes                         | Yes                         | Yes                              | No                     | Yes                | Yes                          | Yes                           | Good               |
| Dev, McBride, Speirs, Donovan, &            | Yes                              | Yes                                                | Yes                          | Yes                    | Yes                   | Yes                    | No                              | Yes                         | Yes                         | Yes                              | No                     | To an extent       | Yes                          | Yes                           | Fair               |

|                                                      |     |     |     |     |              |     |    |              |     |     |    |              |     |     |      |
|------------------------------------------------------|-----|-----|-----|-----|--------------|-----|----|--------------|-----|-----|----|--------------|-----|-----|------|
| Cho (2014)                                           |     |     |     |     |              |     |    |              |     |     |    |              |     |     |      |
| Freedman & Alvarez (2010)                            | Yes | Yes | Yes | Yes | To an extent | Yes | No | Yes          | Yes | Yes | No | To an extent | Yes | Yes | Fair |
| Guerrero, Chu, Franke, & Kuo (2016)                  | Yes | Yes | Yes | Yes | Yes          | No  | No | Yes          | Yes | Yes | No | Yes          | Yes | Yes | Good |
| He, Li, & Wang (2018)                                | Yes | Yes | Yes | Yes | Yes          | No  | No | Yes          | Yes | Yes | No | Yes          | Yes | Yes | Good |
| Horodyski, Hoerr, & Coleman (2004)                   | Yes | Yes | Yes | Yes | Yes          | Yes | No | To an extent | Yes | Yes | No | To an extent | Yes | Yes | Fair |
| Karmacharya, Cunningham, Choufani, & Kadiyala (2017) | Yes | Yes | Yes | Yes | Yes          | No  | No | Yes          | Yes | Yes | No | Yes          | Yes | Yes | Good |
| Katzow, Messito, Mendelsohn, Scott, & Gross (2021)   | Yes | Yes | Yes | Yes | Yes          | No  | No | Yes          | Yes | Yes | No | Yes          | Yes | Yes | Good |
| Lanigan (2012)                                       | Yes | Yes | Yes | Yes | Yes          | No  | No | Yes          | Yes | Yes | No | To an extent | Yes | Yes | Fair |
| Mallan et al. (2013)                                 | Yes | Yes | Yes | Yes | Yes          | No  | No | Yes          | Yes | Yes | No | Yes          | Yes | Yes | Good |
| Mallan et al. (2014)                                 | Yes | Yes | Yes | Yes | Yes          | No  | No | Yes          | Yes | Yes | No | Yes          | Yes | Yes | Good |
| Metbulut,                                            | Yes | Yes | Yes | Yes | To an extent | No  | No | Yes          | Yes | No  | No | Yes          | Yes | Yes | Good |

|                                            |     |     |     |     |     |     |     |                 |     |     |    |                 |     |     |      |
|--------------------------------------------|-----|-----|-----|-----|-----|-----|-----|-----------------|-----|-----|----|-----------------|-----|-----|------|
| Özmert,<br>Teksam, &<br>Yurdakök<br>(2018) |     |     |     |     |     |     |     |                 |     |     |    |                 |     |     |      |
| Reisz et al.<br>(2019)                     | Yes | Yes | Yes | Yes | Yes | No  | No  | Yes             | Yes | Yes | No | To an<br>extent | Yes | Yes | Fair |
| Sigman-Grant<br>et al. (2011)              | Yes | Yes | Yes | Yes | Yes | No  | Yes | Yes             | Yes | Yes | No | Yes             | Yes | Yes | Good |
| Tan et al.<br>(2019)                       | Yes | To an<br>extent | Yes | Yes | No | Yes             | Yes | Yes | Good |
| Tovar et al.<br>(2019)                     | Yes | Tes | Yes | Yes | Yes | Yes | No  | Yes             | Yes | Yes | No | Yes             | Yes | Yes | Good |
| Wasser et al.<br>(2013)                    | Yes | Yes | Yes | Yes | Yes | No  | No  | Yes             | Yes | Yes | No | Yes             | Yes | Yes | Good |
| Yue et al.<br>(2018)                       | Yes | Yes | Yes | Yes | Yes | No  | No  | Yes             | Yes | Yes | No | Yes             | Yes | Yes | Good |
| Zhang et al.<br>(2018)                     | Yes | Yes | Yes | Yes | Yes | Yes | No  | Yes             | Yes | Yes | No | Yes             | Yes | Yes | Good |
