# Supplementary material for: A Systematic Review of Research on Non-Maternal Caregivers’ Feeding of Children 0–3 Years
Source: Int J Environ Res Public Health. 2022 Nov 4;19(21):14463. doi: 10.3390/ijerph192114463 (PMC9658782; doi:10.3390/ijerph192114463)
Supplement: Supplementary file 1 [file ijerph-19-14463-s001.zip › Systematic review Supplementary Table S4.pdf]

Table S4: Evaluation of design and methods for qualitative studies in the review

| Study                                         | Credible findings, knowledge extended | Addressed well original aims and purpose, and scope for wider inference | Clear basis for evaluative appraisal | Defensible research design | Well defended sample | Described well sample composition and coverage | Carried out well data collection | Conveyed well approach to analysis | Portrayed well contexts of data sources | Explored well diversity of content/ perspective, Conveyed well richness of data | Clear links bw data and conclusions | Clearly conveyed assumptions, values, theory | Attention to ethical issues | Clear reporting, Adequately documented research process | Overall assessment |
|-----------------------------------------------|---------------------------------------|-------------------------------------------------------------------------|--------------------------------------|----------------------------|----------------------|------------------------------------------------|----------------------------------|------------------------------------|-----------------------------------------|---------------------------------------------------------------------------------|-------------------------------------|----------------------------------------------|-----------------------------|---------------------------------------------------------|--------------------|
| Anderson, Nicklas, Spence, & Kavanagh (2010)  | Yes, Yes                              | Yes, To an extent                                                       | Yes                                  | Yes                        | Yes                  | Yes                                            | Yes                              | Yes                                | To an extent                            | No, Yes                                                                         | Yes                                 | Yes                                          | Yes                         | Yes, Yes                                                | Fair               |
| Chakona (2020)                                | Yes, Yes                              | Yes, Yes                                                                | Yes                                  | Yes                        | Yes                  | Yes                                            | Yes                              | Yes                                | Yes                                     | Yes, Yes                                                                        | Yes                                 | Yes                                          | Yes                         | Yes, Yes                                                | Good               |
| Eli, Hörnell, Etminan Malek, & Nowicka (2017) | Yes, Yes                              | Yes, Yes                                                                | Yes                                  | Yes                        | Yes                  | Yes                                            | Yes                              | Yes                                | To an extent                            | Yes, Yes                                                                        | Yes                                 | Yes                                          | Yes                         | Yes, Yes                                                | Good               |
| Horodyski & Arndt (2005)                      | Yes, Yes                              | Yes, Yes                                                                | Yes                                  | To an extent               | To an extent         | Yes                                            | Yes                              | To an extent                       | To an extent                            | To an extent, To an extent                                                      | Yes                                 | Yes                                          | Yes                         | Yes, Yes                                                | Fair               |
| Hossain et al. (2018)                         | Yes, Yes                              | Yes, Yes                                                                | Yes                                  | Yes                        | Yes                  | Yes                                            | Yes                              | Yes                                | Yes                                     | Yes, Yes                                                                        | Yes                                 | Yes                                          | Yes                         | Yes, Yes                                                | Good               |
| Jiang et al. (2007)                           | Yes, Yes                              | Yes, Yes                                                                | Yes                                  | Yes                        | Yes                  | Yes                                            | Yes                              | Yes                                | To an extent                            | Yes, Yes                                                                        | Yes                                 | Yes                                          | Yes                         | Yes, Yes                                                | Good               |
| Khandpur,                                     | Yes, Yes                              | Yes, Yes                                                                | Yes                                  | Yes                        | Yes                  | Yes                                            | Yes                              | Yes                                | To an extent                            | Yes, Yes                                                                        | Yes                                 | Yes                                          | Yes                         | Yes, Yes                                                | Good               |

|                                                                     |          |          |     |                 |                 |              |     |     |              |                                  |     |     |     |          |      |
|---------------------------------------------------------------------|----------|----------|-----|-----------------|-----------------|--------------|-----|-----|--------------|----------------------------------|-----|-----|-----|----------|------|
| Charles, &<br>Davison<br>(2016)                                     |          |          |     |                 |                 |              |     |     |              |                                  |     |     |     |          |      |
| Lidgate, Li, &<br>Lindenmeyer<br>(2018)                             | Yes, Yes | Yes, Yes | Yes | Yes             | To an<br>extent | Yes          | Yes | Yes | Yes          | Yes, Yes                         | Yes | Yes | Yes | Yes, Yes | Good |
| Lindsay et al.<br>(2020)                                            | Yes, Yes | Yes, Yes | Yes | Yes             | Yes             | Yes          | Yes | Yes | Yes          | Yes, Yes                         | Yes | Yes | Yes | Yes, Yes | Good |
| Love et al.<br>(2020)                                               | Yes, Yes | Yes, Yes | Yes | Yes             | Yes             | Yes          | Yes | Yes | Yes          | Yes, Yes                         | Yes | Yes | Yes | Yes, Yes | Good |
| Rachmi,<br>Hunter, Li, &<br>Baur (2017)                             | Yes, Yes | Yes, Yes | Yes | Yes             | Yes             | Yes          | Yes | Yes | Yes          | Yes, Yes                         | Yes | Yes | Yes | Yes, Yes | Good |
| Roshita,<br>Schubert, &<br>Whittaker<br>(2012)                      | Yes, Yes | Yes, Yes | Yes | Yes             | Yes             | Yes          | Yes | Yes | Yes          | Yes, Yes                         | Yes | Yes | Yes | Yes, Yes | Good |
| Tan et al.<br>(2019)                                                | Yes, Yes | Yes, Yes | Yes | Yes             | Yes             | To an extent | Yes | Yes | To an extent | To an<br>extent, To<br>an extent | Yes | Yes | Yes | Yes, Yes | Fair |
| Vandeweghe<br>et al. (2016)                                         | Yes, Yes | Yes, Yes | Yes | To an<br>extent | Yes             | Yes          | Yes | Yes | To an extent | Yes, Yes                         | Yes | Yes | Yes | Yes, Yes | Fair |
| Wallace,<br>Lombardi, De<br>Backer,<br>Costello, &<br>Devine (2020) | Yes, Yes | Yes, Yes | Yes | Yes             | Yes             | Yes          | Yes | Yes | Yes          | Yes, Yes                         | Yes | Yes | Yes | Yes, Yes | Good |
